# Supplementary material for: Use of Software for Tablet Computers to Promote Engagement With Supported Employment: Results From an RCT
Source: Atypon-hosted journal article supplement (doi:10.1176/appi.ps.201300275), 2014-07-01
Supplement: 954_ds001.pdf [file 954_ds001.pdf]

Participant characteristics

| Characteristic                | Overall<br>N = 45 | Brochure<br>Condition<br>N = 23 | Computer<br>Condition<br>N = 22 |
|-------------------------------|-------------------|---------------------------------|---------------------------------|
| Mean age, years (SD)          | 47(13)            | 48(13)                          | 45(13)                          |
| Male                          | 31(69%)           | 16(70%)                         | 15(69%)                         |
| Ethnicity                     |                   |                                 |                                 |
| African American              | 20(44%)           | 9(39%)                          | 11(50%)                         |
| White non-Hispanic            | 12(27%)           | 7(30%)                          | 5(23%)                          |
| Other                         | 13(29%)           | 7(30%)                          | 6(27%)                          |
| Work History (competitive)    |                   |                                 |                                 |
| Ever worked                   | 42(93%)           | 22(96%)                         | 20(91%)                         |
| Worked in last 5 yrs          | 10(24%)           | 7(32%)                          | 3(15%)                          |
| One job lasting > 1 yr        | 26(62%)           | 13(59%)                         | 13(65%)                         |
| Primary Diagnosis             |                   |                                 |                                 |
| Mood disorder <sup>a</sup>    | 14(31%)           | 5(22%)                          | 9(41%)                          |
| Thought disorder <sup>b</sup> | 31(69%)           | 18(78%)                         | 13(59%)                         |
| Social Security Benefits      |                   |                                 |                                 |
| None                          | 4(9%)             | 3(13%)                          | 1(5%)                           |
| SSI only                      | 28(62%)           | 14(61%)                         | 14(64%)                         |
| Other <sup>c</sup>            | 13(29%)           | 6(26%)                          | 7(32%)                          |

No characteristics were significantly different between conditions at the 0.05 level

<sup>a</sup>Chart diagnosis of major depression or bipolar disorder

<sup>b</sup>Chart diagnosis of schizophrenia or schizo-affective disorder

<sup>c</sup>Participants endorsed either “not sure”, “SSI and SSDI” or “SSDI”

# Tri-fold control condition brochure: outer



**Gilberto**  
  
*"I'm finishing my high school degree and working a part-time job. You can't rely on benefits. I'm thinking about my future."*

**Clara**  
  
*"My employment specialist helps me talk to my manager when I have problems. Employment means having money and something that I want to do."*

**Sarah**  
  
*"I'm 59 years old but I still feel like I have something to contribute. I want to get out of my apartment. I like meeting people."*

**If you are ready to try Supported Employment**  
**Here's what you can do**

Call  to schedule an appointment with an employment specialist

**or you can**

Send an email to:   
and say that you want to try supported employment

**Supported Employment**  
Helping you get the job you want

**Look Inside!**

- What is Supported Employment?
- What happens when I try Supported Employment?
- Is Supported Employment right for me?
- How do I get started?

## Have you thought about getting a job?

### Supported employment helps people get jobs.

If you want to work, you can ask for an appointment with a supported employment worker. Supported employment is very simple. You do not have to take tests or classes. All you have to do is talk with an employment specialist about jobs that you want. Then you can get started looking for jobs as soon as you feel ready.

Working can be  
one of the keys to  
a brighter future.

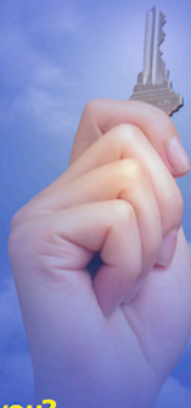

### Is supported employment right for you?

Many people who have a mental illness want to work. Also, most people who try supported employment do get a job. If you are interested in working, supported employment may be able to help you get and keep a job that you want.

For information on how to get an appointment with an employment specialist, see the back of this brochure.

### Some facts about supported employment:

- Anyone can try supported employment. If you are a member, then you are automatically eligible.
- The jobs that supported employment helps people to get are regular jobs in the community.
- In supported employment, you do not have to work. You only apply for jobs that you want.
- Your employment specialist will continue to help you after you get a job.
- You may be able to keep all or part of your benefits from Social Security or other benefits while you are working.
- You decide whether or not your employment specialist talks to employers for you. You also decide whether or not employers know about your mental illness.
